# Supplementary material
Source: publisher site journal article supplement (https://www.dovepress.com/article/264276)

**Supplementary Material**

**Supplementary Figure 1.** Graphical representation of the statistically significant associations between the parameters and ICU outcome using Bayesian network. Lines represent direct associations. Associations that remained statistically significant on ≥20 of 100 bootstraps are plotted. Numbers of times each association persisted during bootstrap are shown.


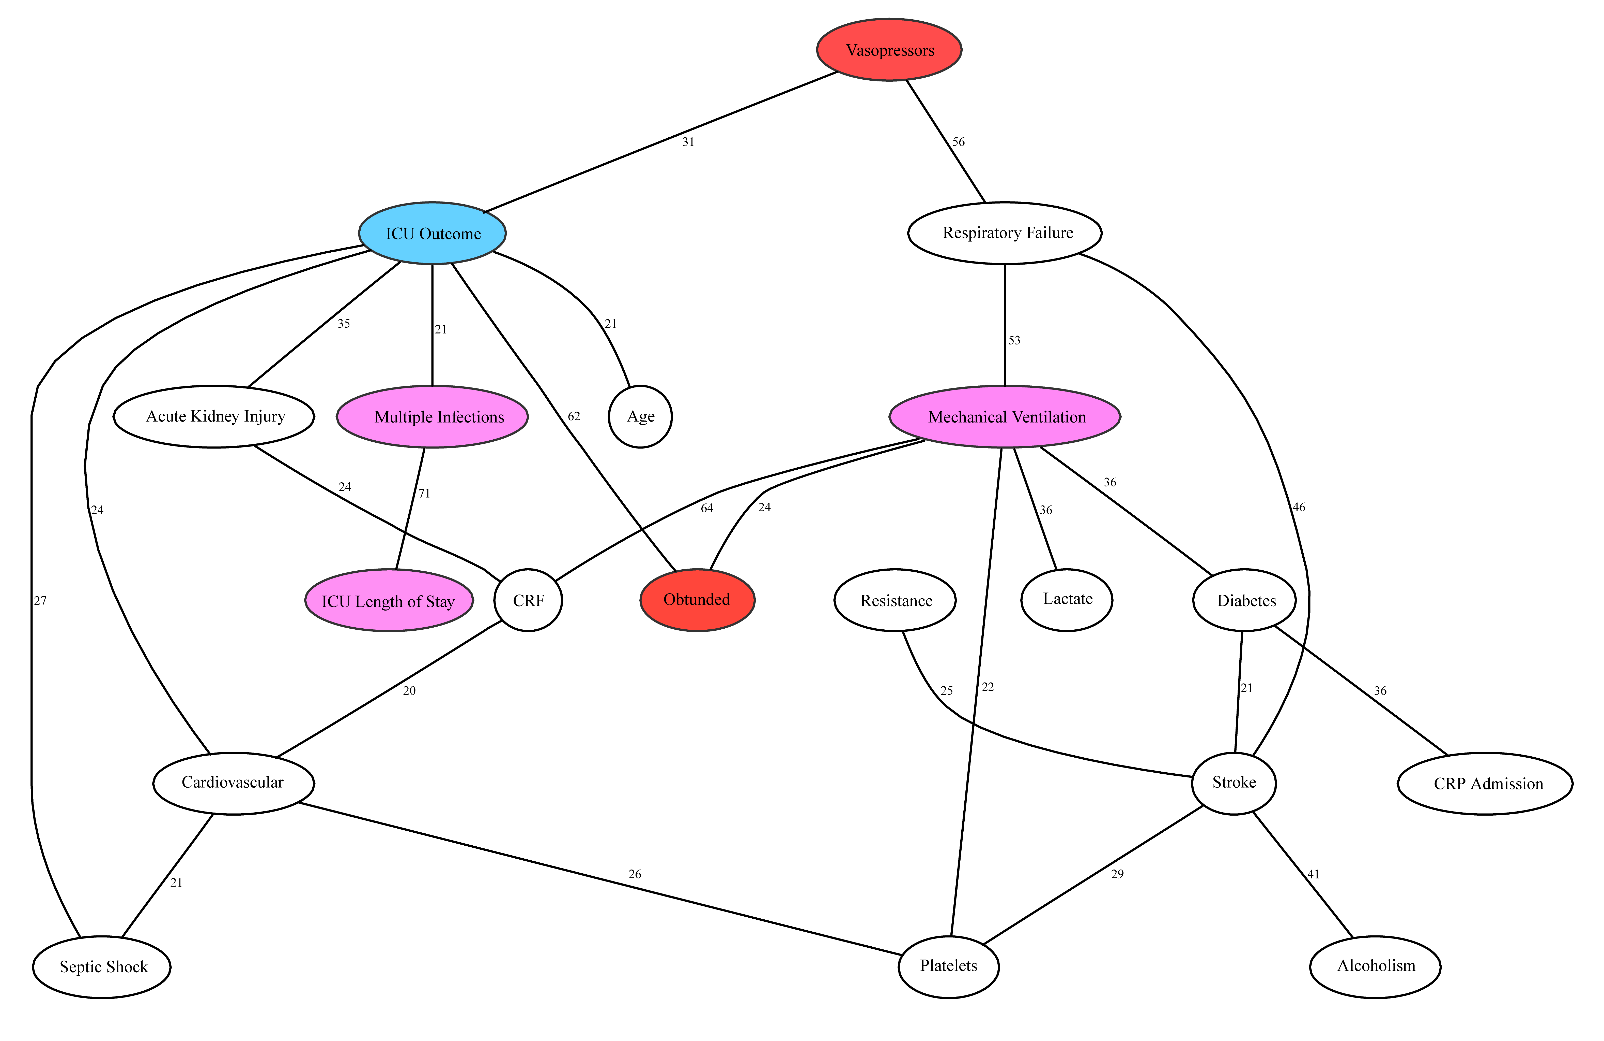

Supplement: Supplementary file 1 [file get_supplementary_file.php]
